# Molecular Characterization of *Clostridium botulinum* Isolates from Foodborne Outbreaks in Thailand, 2010

Piyada Wangroongsarb<sup>1</sup>, Tomoko Kohda<sup>2</sup>, Chutima Jittaprasartsin<sup>1</sup>, Karun Suthivarakom<sup>1</sup>, Thanitchi Kamthalang<sup>1</sup>, Kaoru Umeda<sup>3</sup>, Pathom Sawanpanyalert<sup>4</sup>, Shunji Kozaki<sup>2</sup>, Kazuyoshi Ikuta<sup>5\*</sup>

**1** Department of Medical Sciences, National Institute of Health, Nonthaburi, Thailand, **2** Department of Veterinary Science, Osaka Prefecture University, Osaka, Japan, **3** Department of Microbiology, Osaka City Institute of Public Health and Environmental Sciences, Osaka, Japan, **4** Department of Medical Sciences, Nonthaburi, Thailand, **5** Department of Virology, Osaka University, Osaka, Japan

## Abstract

**Background:** Thailand has had several foodborne outbreaks of botulism, one of the biggest being in 2006 when laboratory investigations identified the etiologic agent as *Clostridium botulinum* type A. Identification of the etiologic agent from outbreak samples is laborious using conventional microbiological methods and the neurotoxin mouse bioassay. Advances in molecular techniques have added enormous information regarding the etiology of outbreaks and characterization of isolates. We applied these methods in three outbreaks of botulism in Thailand in 2010.

**Methodology/Principal Findings:** A total of 19 cases were involved (seven each in Lampang and Saraburi and five in Maehongson provinces). The first outbreak in Lampang province in April 2010 was associated with *C. botulinum* type F, which was detected by conventional methods. Outbreaks in Saraburi and Maehongson provinces occurred in May and December were due to *C. botulinum* type A1(B) and B that were identified by conventional methods and molecular techniques, respectively. The result of phylogenetic sequence analysis showed that *C. botulinum* type A1(B) strain Saraburi 2010 was close to strain Iwate 2007. Molecular analysis of the third outbreak in Maehongson province showed *C. botulinum* type B8, which was different from B1–B7 subtype. The nontoxic component genes of strain Maehongson 2010 revealed that *ha33*, *ha17* and *botR* genes were close to strain Okra (B1) while *ha70* and *ntnh* genes were close to strain 111 (B2).

**Conclusion/Significance:** This study demonstrates the utility of molecular genotyping of *C. botulinum* and how it contributes to our understanding the epidemiology and variation of *boNT* gene. Thus, the recent botulism outbreaks in Thailand were induced by various *C. botulinum* types.

**Citation:** Wangroongsarb P, Kohda T, Jittaprasartsin C, Suthivarakom K, Kamthalang T, et al. (2014) Molecular Characterization of *Clostridium botulinum* Isolates from Foodborne Outbreaks in Thailand, 2010. PLoS ONE 9(1): e77792. doi:10.1371/journal.pone.0077792

**Editor:** S. Ashraf Ahmed, United States Army Medical Research Institute of Infectious Diseases, United States of America

**Received:** March 20, 2013; **Accepted:** September 4, 2013; **Published:** January 27, 2014

**Copyright:** © 2014 Wangroongsarb et al. This is an open-access article distributed under the terms of the Creative Commons Attribution License, which permits unrestricted use, distribution, and reproduction in any medium, provided the original author and source are credited.

**Funding:** This work was supported in part by Department of Medical Science, Ministry of Public Health co-operated with Japan Science and Technology Agency/ Japan International Cooperation Agency, Science and Technology Research Partnership for Sustainable Development (JST/JICA, SATREPS) with no additional external funding received for this study. The funders had no role in study design, data collection and analysis, decision to publish, or preparation of the manuscript.

**Competing Interests:** The authors have declared that no competing interests exist.

\* E-mail: ikuta@biken.osaka-u.ac.jp

## Introduction

In the past, Thailand has experienced several foodborne outbreaks of botulism. During December 1997, six people from the Maesot district in Tak province found ill after consumption of homemade canned bamboo shoots. In April 1998, an outbreak in Thawangpha district, Nan province affected nine people who were hospitalized, four of whom required mechanical ventilation [1,2]. The biggest botulism outbreak occurred in Banluang district, Nan province, in March 2006, affecting 209 people who attended a local Buddhist festival, and ate bamboo shoots [3,4]. Administration of antitoxin resulted in no casualties in these outbreaks.

Foodborne botulism is first diagnosed on the basis of the patient's symptoms and food history. Isolation of *C. botulinum* from stool or gastric samples along with signs and symptoms are definitive indication of botulism. But recovery of the organism from food that does not contain demonstrable toxin is inconclusive. The diagnosis has been ascertained by detecting toxin in the

patients' serum, stool or in the food consumed before the onset of illness [5]. The mouse bioassay is the most widely accepted method for detecting botulinum neurotoxins (BoNTs) in serum and suspected foods. This assay has the desired sensitivity (< five mouse lethal units/mL), but it is cumbersome, time consuming (one to four days) and involves the use of large numbers of animal [6,7]. Alternatively *in vitro* methods such as enzyme-linked immunosorbent assay (ELISA) [7–9] and an assay with a large immune-sorbent surface area (ALISSA) [10] require only 5–6 hrs for the detection and are as sensitive as the mouse bioassay [7–9]. They are rapid and have a wider detection range including foods, environmental and sera samples [7–10]. The evolving epidemics of foodborne diseases must be monitored and understood to implement appropriate prevention methods. Traditionally, characterization and identification of the botulism outbreak require recovery of the organism by conventional culture methodology [11,12] and mouse bioassay for detection neurotoxin production [6,13]. Rapid test kits, based on phenotypic characteristics of

**Table 1.** *C.botulinum* strains and sequences used in this study.

| Bacterial strain    | BoNT subtype              | GenBank Accession No.                                 | Origin (Country, Year)                | Source or Reference    | Testing                                |
|---------------------|---------------------------|-------------------------------------------------------|---------------------------------------|------------------------|----------------------------------------|
| 62A                 | A1                        | –                                                     | Stock strain                          | Osaka Prefecture,Japan | PCR, PFGE                              |
| Chiba H             | A2                        | –                                                     | Honey (Japan, 1986)                   | Osaka Prefecture,Japan |                                        |
| Renkon              | A(B) <sup>b</sup>         | –                                                     | Karahi renkon (Japan, 1984)           | Osaka Prefecture,Japan |                                        |
| Langeland           | F                         | –                                                     | Duck liver paste (Denmark, 1958 )     | Osaka Prefecture,Japan |                                        |
| Osaka 05 nontoxic   | Osaka 05nontoxic          | –                                                     | Infant botulism (Japan, 2005)         | Osaka Prefecture,Japan |                                        |
| 89E00061-2          | B1                        | –                                                     | Infant botulism (United States,1989)  | Osaka Prefecture,Japan |                                        |
| Ginger              | B2                        | –                                                     | Ginger (Japan)                        | Osaka Prefecture,Japan |                                        |
| 7H215S              | B2                        | –                                                     | Honey (Japan)                         | Osaka Prefecture,Japan |                                        |
| 111 nontoxic        | B2                        | –                                                     | Infant botulism (Japan, 1995)         | Osaka Prefecture,Japan |                                        |
| 657                 | Ba                        | –                                                     | Unknown                               | Osaka Prefecture,Japan |                                        |
| DMST27808           | A                         | –                                                     | Unknown                               | NIH, Thailand          |                                        |
| DMST27809           | B                         | –                                                     | Unknown                               | NIH, Thailand          |                                        |
| DMST 27810          | F                         | –                                                     | Unknown                               | NIH, Thailand          |                                        |
| Osaka06             | B2                        | AB302853                                              | Infant botulism (Japan, 2006)         | GenBank                | Phylogenetic analysis                  |
| CDC1758             | B1                        | EF033127                                              | Unknown                               | GenBank                |                                        |
| Danish              | B1                        | M81186                                                | Unknown                               | GenBank                |                                        |
| Hall6517(B)         | B1                        | EF028399                                              | Unknown                               | GenBank                |                                        |
| CDC1656             | B1                        | EF028396                                              | Unknown                               | GenBank                |                                        |
| Prevot25 NCASE      | B2                        | EF033129                                              | Unknown                               | GenBank                |                                        |
| ATCC7949            | B2                        | EF028395                                              | Unknown                               | GenBank                |                                        |
| Smith L-590         | B2                        | EF028398                                              | Unknown                               | GenBank                |                                        |
| Prevot59            | B2                        | EF033128                                              | Unknown                               | GenBank                |                                        |
| CDC1828             | B2                        | EF051571                                              | Unknown                               | GenBank                |                                        |
| CDC6291             | B2                        | EF028401                                              | Unknown                               | GenBank                |                                        |
| Korean soil 1       | B2                        | DQ417353                                              | Korean soil                           | GenBank                |                                        |
| Korean soil 2       | B2                        | DQ417354                                              | Korean soil                           | GenBank                |                                        |
| CDC795              | B3                        | EF028400                                              | Unknown                               | GenBank                |                                        |
| CDC593              | A(B) <sup>b</sup>         | AF300466                                              | Dog feces (United States, 1976)       | GenBank                |                                        |
| CDC1436             | Bivalent, AB <sup>c</sup> | AF295926                                              | Stool sample (United States, 1977)    | GenBank                |                                        |
| 657Ba               | Bivalent, Ba <sup>c</sup> | EF033130                                              | Unknown                               | GenBank                |                                        |
| CDC588              | Bivalent, Ab <sup>c</sup> | AF300465                                              | Food borne (United States, 1976)      | GenBank                |                                        |
| CDC3281             | Bivalent, BF <sup>c</sup> | Y13630                                                | Infant botulism (United States, 1980) | GenBank                |                                        |
| ATCC17844           | Nonproteolytic            | EF028394                                              | Unknown                               | GenBank                |                                        |
| Eklund17B (B257)    | Nonproteolytic            | EF051570                                              | Unknown                               | GenBank                |                                        |
| 10068               | Nonproteolytic            | EF028402                                              | Unknown                               | GenBank                |                                        |
| Eklund17B           | Nonproteolytic            | X71343                                                | Unknown                               | GenBank                |                                        |
| NTCT 2916           | A(B) <sup>b</sup>         | ZP 02612822                                           | Unknown                               | GenBank                |                                        |
| Bac-04-07755        | B7                        | JQ354985                                              | Unknown                               | GenBank                |                                        |
| NCTC3807            | B7                        | JN120760                                              | Unknown                               | GenBank                |                                        |
| 111                 | B2                        | AB302854,<br>AB084152                                 | Infant botulism (Japan, 1995)         | GenBank                | PCR, PFGE,<br>Phylogenetic<br>analysis |
| Okra                | B1                        | AB232927                                              | Food borne (unknown)                  | GenBank                |                                        |
| Osaka 05            | Osaka 05                  | AB302852                                              | Infant botulism (Japan, 2005)         | GenBank                |                                        |
| Iwate 2007          | A(B) <sup>b</sup>         | AB665556                                              | Stool sample                          | GenBank                |                                        |
| Saraburi S1, 2010   | <b>A(B)<sup>a</sup></b>   | <b>JQ964804<sup>a</sup>,<br/>JQ964805<sup>a</sup></b> | Foodborne (Thailand, 2010)            | This study             |                                        |
| Maehongson S1, 2010 | <b>B8<sup>a</sup></b>     | <b>JQ964806<sup>a</sup></b>                           | Foodborne (Thailand, 2010)            | This study             |                                        |

Table 1. Cont.

| Bacterial strain                  | BoNT subtype          | GenBank Accession No.       | Origin (Country, Year)     | Source or Reference | Testing |
|-----------------------------------|-----------------------|-----------------------------|----------------------------|---------------------|---------|
| Maehongson S1, 2010 nontoxic gene | <b>B8<sup>a</sup></b> | <b>JQ964807<sup>a</sup></b> | Foodborne (Thailand, 2010) | This study          |         |

<sup>a</sup>The subtypes and GenBank accession numbers for strains determined in this study are indicated in boldface.

<sup>b</sup>*boNT/A* producing and unexpressed *boNT/B* gene possessing.

<sup>c</sup>Dual toxin producing strains; the major toxin type is indicated in uppercase letters and the minor type is indicated in lowercase letters.

doi:10.1371/journal.pone.0077792.t001

anaerobic bacteria have been developed, but their sensitivity and specificity remain inadequate for *C. botulinum* identification [14,15]. In addition, reliable typing of strains can only be made when the BoNT belongs to a known serotype. Recently, molecular techniques for detecting *boNT* gene have been introduced in an attempt to replace the consuming time conventional methods [16–18]. There are seven antigenic serotypes of BoNT (A through G). Serotypes A, B, E and rarely F, can affect humans, while serotypes C and D cause botulism in animals worldwide [19]. Type G has been isolated from soil and from cases of unexplained deaths in Switzerland [20,21]. Types A and B are generally associated with outbreaks in temperate and warmer zones, with one type often predominating over the other. Proteolytic types A and B are linked to the majority of the outbreaks in the United States, China, South America and southern European countries, and the most frequently implicated foods are vegetables. In Central Europe the vehicle is most often a meat product with the causative organism being non-proteolytic type B strains. More than 90% of the outbreaks are caused by home-prepared/home-preserved foods [5]. Type E has a limited geographical distribution and occurs primarily in northern countries such as Canada, Finland, Japan, Norway, Sweden, Russia, and Alaska in the United States [22].

Molecular characterization of BoNTs relies on their sequences of the structural genes/proteins of *C. botulinum* and sequence variations within BoNTs of serotype have led to the designation of subtypes. BoNT type A (prominent due to its high toxicity and long duration of action) that is divided into five subtypes, A1–A5 [23]; type B has seven subtypes, B1–B7 [24,25]; type E is classified into nine subtypes, E1–E9 [22,26]; and type F is divided into F1–F7 subtypes [27]. There are no reported subtypes for C, D and G [28]. However, the BoNT C/D and D/C mosaic types are considered to be BoNT C and D subtypes, respectively [29–31].

In 2010, three distinct outbreaks were reported, two in April and May in Lampang and Saraburi provinces, respectively each with seven cases, and a third outbreak in December 2010 in Maehongson province with five cases. This paper describes the molecular characterization of the *C. botulinum* isolates from these three outbreaks in Thailand.

## Materials and Methods

For the first outbreak in Lampang province, four stool samples, six serum samples and five food items (wild boar meat, sour meat samples and three others suspected food samples) were collected during 20 April to 17 May 2010. During the second outbreak in Saraburi province, four stool samples, three sera samples and four food items (the plastic wrap from pork sausages sample, pickled vegetables and the cans that these samples were retained and sour pork) were obtained from 17–25 May, 2010. Suspected samples in the third outbreak in Maehongson province were two stool

samples, four sera samples and two fermented soy bean samples during 16–18 December, 2010. All samples were sent to the Anaerobic Bacteria Section, National Institute of Health, Thailand for identification. One gram of food or stool specimen was weighed in a sterile container. For grinding the foods, the samples were transferred to a sterile mortar and 1 ml of cold gelatin diluent buffer was added. After homogenization, the samples were centrifuged at 12,000×g for 20 min, and the supernatant was tested by mouse bioassay for toxigenicity [6,13]. Animal testing laboratory in this study was performed in accordance with the Institutional recommendations. The protocol was approved by the National Institute of Health Animal Care and Use Committee (NIH-ACUC, permit no. 55–009). After testing, the remaining laboratory animals were euthanized by CO<sub>2</sub> gas administration according to the IACUC guidelines.

Half of the pellet from each sample was inoculated and grown on Egg Yolk Agar (EY) plates, Botulinum Selection Medium (BSM) (or Reinforced Clostridium Medium (RCM)) plates and incubated under anaerobic conditions at 35°C for two days. The remaining half of the pellet was divided in third and inoculated onto Chopped Meat-Glucose-Starch (CMGS) medium, CMGS medium heated at 80°C for 15 min (to select for *Clostridium* species), and Tryptone peptone glucose yeast extract trypsin (TPGYT). The inoculated samples were incubated under anaerobic conditions at 35°C for five days. Isolates were fully characterized by the methods of Dowell and Hawkins [11], and biochemical testing by Holdeman [12].

## Detection of *C. botulinum* Neurotoxins by Enzyme-linked Immunosorbent Assay (ELISA)

Samples of the 2010 outbreak were inoculated into Tryptone peptone glucose yeast extract trypsin (TPGYT) broth and the cultures were incubated for five to seven days at 35°C. The double sandwich ELISA tests [9] were provided by the Centers for Disease Control and Prevention (CDC), Atlanta. On each assay plate, there is positive control for botulinum neurotoxin type A, B, E, and F. The absorbance values ≥0.2 units were considered positive. The ELISA-positive samples were confirmed by neurotoxicity mouse bioassay.

## Mouse Bioassay

Typing and detection of BoNTs in serum and culture supernatants were performed by neurotoxicity mouse bioassay according to Hatheway et al. [6,7]. The toxin type was identified by specific neutralization of biologic activity by using monovalent botulism antitoxin (available to qualified laboratories from the Biological Reagents Program, CDC). The concentration of monovalent reagents was approximately 10 IU/ml.

## DNA Extraction and Purification

Reference strains of *C. botulinum* (Table 1) were grown in Wilkins Chalgren broth (WB) [32], incubated anaerobically at 35°C for 48 hrs, and then harvested by low speed centrifugation. Pellets were resuspended in 1 ml of distilled water, and chromosomal DNA extracted using the QIAamp DNA Mini Kit (Qiagen Inc., Valencia, CA), according to the manufacturer's instructions. DNA was eluted with 100 µl elution buffer and stored at 4°C until use.

## Identification of *C. botulinum* DNA by Multiplex PCR

The PCR was modified from the method of Lindström et al. [16] and used to identify BoNT types A through F. A 30 µl of reaction mix containing 0.5 µl of extracted DNA template, 0.1 µM of each primer, 200 nM of each deoxynucleotide triphosphate (dNTP), 5 × Buffer, 1 U of GoTaq® DNA polymerase and 1.5 mM MgCl<sub>2</sub> (Promega, Madison, WI, USA) was used. PCR was for 35 cycles, including a denaturation step at 95°C for 20 sec, annealing at 55°C for 30 sec and extension at 62°C for 2 min. The amplified PCR products were visualized by ethidium bromide in 2% agarose gels. All positive results were run through neurotoxicity testing for confirmation.

## Multiplex PCR for *boNT/A* and *B* Subtyping

The method of Umeda et al. [33] was used for PCR typing of *boNT/A*, and Umeda et al. [25] for *boNT/B* typing except that 1 U of GoTaq® DNA polymerase and its associated buffer were used (Promega, Madison, WI, USA).

## Multiplex PCR of *ha33* and *p47* genes for Confirmation of *boNT/A* and *boNT/B* Typing

The PCR method was described by Umeda et al. [33] using 1 U of GoTaq® DNA polymerase and 1.5 mM MgCl<sub>2</sub> (Promega, Madison, WI, USA). The amplified products of the *ha33* gene and *p47* gene confirmed as *C. botulinum* type A1 strain and type A2 strain, respectively. Both *ha33* and *p47* gene products indicated strain possessing both *boNT/A* and *boNT/B* genes (either expressed or unexpressed).

## Sequence Analysis of *boNT* and/or Nontoxic Component Genes for Strain Differentiation

Overlapping primer pairs covering the coding sequence of the different *boNT* and nontoxic component genes were designed for PCR amplification using sequence data available on GenBank (Table 1). Internal DNA oligomers were also designed within each amplicon for confirmatory sequence analysis in both directions. PCR was performed in a 50 µl reaction containing 1 ng of extracted DNA, 0.5 µM of each primer, 2.5 mM of MgCl<sub>2</sub>, 200 µM of each dNTP, 5 × Buffer and 2.5 U of GoTaq® DNA polymerase and 1.5 mM of MgCl<sub>2</sub> (Promega). Each PCR cycle consisted of denaturation at 94°C for 1 min, 55°C for 1 min, 72°C for 1 min and was repeated 30 times. Final extension was carried out 72°C for 10 min. Amplicons were directly sequenced by primer walking, and the sequence (in both directions) was confirmed using the ABI Prism BigDye Terminator Cycle Sequencing Kit (Applied Biosystems, Foster City, CA).

## Phylogenetic Analysis

DNA alignments were created with Clustal-W version 2.0 (<http://www.clustal.org>) [34]. A phylogenetic tree was constructed based on the sequences of *boNT/B* (Table 1) using neighbor-joining method with 1,000 bootstrap replication, and the genetic distance matrix using Molecular Evolution genetic Analysis program (MEGA) version 5.0 [35].

## PFGE-probe Hybridization to Identify the Chromosomal or Plasmid Location of the *boNT* Gene

PFGE plug was prepared as described by Umeda et al. [25]. DNA was undigested and electrophoresed in a CHEF-DRIII apparatus (Bio-Rad Laboratories, Hercules, CA) through a 1% pulse field certified agarose gel (Bio-Rad Laboratories) in 0.5 × Tris-borate-EDTA buffer (pH 8.3) at 14°C for and 6 V/cm. The switching times were ramped from 0.5 to 40 s for 18 hrs. The PFG was blotted onto Hybond N+ nylon membrane (Amersham Pharmacia Biotech, Little Chalfont, Buckinghamshire, UK) using 20 × SSC for 18 hrs, and the DNA fixed to the membrane by UV irradiation. The *boNT/A* and *boNT/B* gene probes were prepared as reported by Takeshi et al. [36] and the *C. botulinum* Saraburi type A(B) and Maehongson B probes were prepared by digoxigenin (DIG)-labeling of the PCR products (Roche Diagnostics, Mannheim, Germany) as described by Umeda et al. [25]. Membranes were incubated at 55°C overnight with 20 ng/ml of each probe and then washed twice with 1 × SSC containing 0.1% sodium dodecyl sulfate (SDS) for 5 min at room temperature, followed by two washes with 0.1 × SSC/0.1% SDS at 55°C for 15 min. Membranes were rinsed in 100 mM malic acid, 100 mM Tris-HCl, 150 mM NaCl, pH 7.5 (Buffer 1), then blocked with 100 mM malic acid, 100 mM Tris-HCl, 150 mM NaCl, pH 7.5, 5% skim milk (Buffer 2) at room temperature for 30 min. Hybridization signals were detected with anti-DIG antibody (Roche Diagnostics, Mannheim, Germany) incubated for 30 min at room temperature in Buffer 2. Excess antibody was removed by washing twice with Buffer 1 plus 0.05% Tween-20 at room temperature for 10 min, followed by a wash in 1 M Tris-HCl, pH 9.5, 1 M NaCl (Buffer 3) at room temperature for 2 min. CDP star (Roche Diagnostics) was used at a 1:1000 dilution in Buffer 3. The membrane was immersed for 2–3 min for signal development. The membrane was sealed in a plastic bag and exposed to X-ray film for 2–15 min.

## Nucleotide Sequence Accession Numbers

The nucleotide sequences determined in this work were submitted to the NCBI database with accession numbers JQ964804 to JQ964807 (Table 1).

## Results

### Isolation and Identification of *C. botulinum* and Detection of Neurotoxin Production

From Lampang province outbreak, *C. botulinum* type F was identified in one sample each of wild boar meat and sour pork by ELISA and mouse bioassay, but these samples were negative in the culture method. The positive result samples (one plastic-wrapped pork sausage (F1) and two stool specimens (S1, S2)) from Saraburi province outbreak and positive result samples (two fermented soy bean samples (F1, F2) and two stool specimens (S1, S2)) from Maehongson province outbreak were detected as *C. botulinum* type A and B by ELISA and mouse bioassay, and also isolated *C. botulinum* from positive samples (Table 2).

### Identification of *C. botulinum* DNA, *boNT/A* and *boNT/B* Subtyping by Multiplex PCR

PCR was used to identify *boNT* type, both the *boNT/A* and *boNT/B* genes from the Saraburi 2010 outbreak. BoNT type A was identified by ELISA and mouse bioassay but no BoNT B toxin was present (Table 2). Further molecular characterization of both *boNT* genes detected in the Saraburi 2010 strains indicated existence of types A1(B) (Fig. 1A and 1B). The Maehongson 2010

**Table 2.** Summary of botulism outbreaks in Thailand during 2010, by using culture, ELISA, mouse bioassays and molecular techniques.

| Province/Outbreak period (2010) | No. of Cases | Sample                         | BONT type      |   |   |   |       |   |   |   | Isolation <i>C. botulinum</i> | Molecular typing |
|---------------------------------|--------------|--------------------------------|----------------|---|---|---|-------|---|---|---|-------------------------------|------------------|
|                                 |              |                                | Mouse bioassay |   |   |   | ELISA |   |   |   |                               |                  |
|                                 |              |                                | A              | B | E | F | A     | B | E | F |                               |                  |
| Lampang 20April–17 May          | 7            | Wild boar meat                 | D              | D | D | A | –     | – | – | + | –                             | –                |
|                                 |              | Sour pork                      | D              | D | D | A | –     | – | – | + | –                             | –                |
| Saraburi 17–25 May              | 7            | Plastic wrap pork sausage (F1) | A              | D | D | D | +     | – | – | – | +                             | A1(B)            |
|                                 |              | Stool specimen (S1)            | A              | D | D | D | +     | – | – | – | +                             | A1(B)            |
|                                 |              | Stool specimen (S2)            | A              | D | D | D | +     | – | – | – | +                             | A1(B)            |
| Maehongson 16–18 December       | 5            | Fermented soy bean sample (F1) | D              | A | D | D | –     | + | – | – | +                             | B8               |
|                                 |              | Fermented soy bean sample (F2) | D              | A | D | D | –     | + | – | – | +                             | B8               |
|                                 |              | Stool specimen (S1)            | D              | A | D | D | –     | + | – | – | +                             | B8               |
|                                 |              | Stool specimen (S2)            | D              | A | D | D | –     | + | – | – | +                             | B8               |

D = Dead, A = Alive + = Positive, – = Negative.  
doi:10.1371/journal.pone.0077792.t002

isolates were typed as B in the ELISA and mouse bioassay (Table 2) and the PCR results indicated a BoNT B2-like gene (Fig. 1C).

**Multiplex PCR of *ha33* and *p47* genes for Confirmation of *boNT/A* and *boNT/B* Typing**

Amplification of *ha33* and *p47* genes indicated presence of both *boNT/A* and *boNT/B* genes (either expressed or unexpressed) (Fig. 2). These results showed that toxin belonged to cluster type 3. Therefore, the Saraburi 2010 isolates are considered strain A1(B) [33].

**Sequence Analysis of *C. botulinum boNT/A* and *boNT/B* genes from Saraburi 2010 A1(B) and Maehongson 2010 (B) Strains**

In the Saraburi outbreak the *C. botulinum* isolates were identified as type A1(B). The Saraburi 2010 *boNT/A1* amino acid sequence

showed 100% identity and similarity to *C. botulinum* type strain NTCT 2916 type A1(B), while the *boNT/B* amino acid sequence was 99.6% identical and showed 99.3% similarity to strain Iwate 2007, which was also an A1(B) type.

A BLAST analysis of *boNT/B* amino acid sequences from the Maehongson 2010 strain showed a 96% identity with other B2 strains. The Maehongson 2010 B strain had a 96% identity and 98.5% similarity to strain 111 (Table 3), the differences involved 52 amino acid residues (Table 4). Six residues were in the light chain (L) which was 441 amino acid long, and 46 residues in the heavy chain (H), 850 amino acid. The N-terminus of the heavy chain (H<sub>N</sub>) (residues 442–861, a total of 420 amino acids) had 15 substitutions, and the C-terminus of the H-chain (H<sub>C</sub>) had 31/430 amino acid changes. Most of the changes in the H<sub>C</sub>, were concentrated in the H<sub>CC</sub> subdomain (22/263 amino acid), while only 9/167 amino acid were different in the N terminal of the H<sub>CN</sub>. Comparing these domains to strain 111 and Maehongson

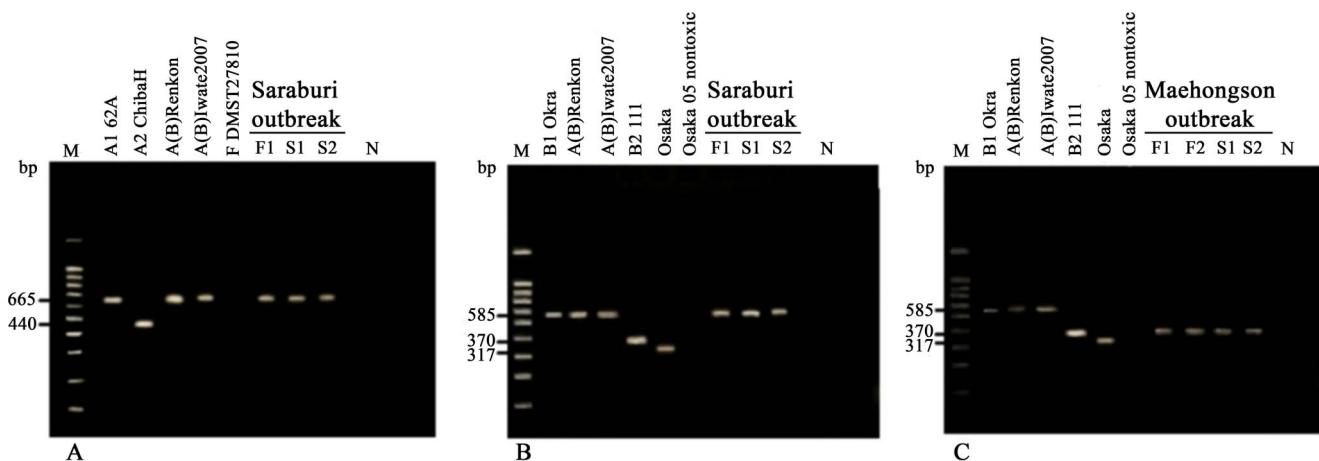

**Figure 1. Multiplex PCR typing of *boNT/A* and *boNT/B* genes for Saraburi and Maehongson 2010 outbreak strains.** The PCR pattern of Saraburi 2010 showed positive *boNT/A1* amplicon (665 bp, gel A lanes 6–8) and *boNT/B1* like amplicon (585 bp, gel B lanes 7–9). The PCR patterns of Maehongson 2010 indicated a *boNT/B2*-like gene was present as 370 bp amplicon (gel C, lanes 8–11).  
doi:10.1371/journal.pone.0077792.g001



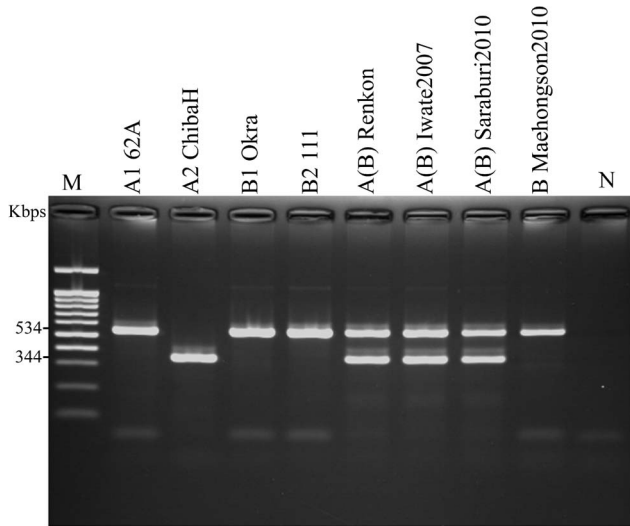

**Figure 2. Multiplex PCR of *ha33* and *p47* genes for confirmation of *boNT/A* and *boNT/B* typing** Isolate from Saraburi 2010 strain showed positive *ha33* and *p47* amplicon (534 bp and 344 bp, lane 7), *ha 33* of *boNT/A1* amplicon (534 bp, lane 1), *p47* of *boNT/A2* amplicon (344 bp, lane 2). doi:10.1371/journal.pone.0077792.g002

2010 showed amino acid identities of 98.60% (L), 95.12% (H), 97.13% (H<sub>N</sub>), 95.12% (H<sub>CN</sub>) and 93.04% (H<sub>CC</sub>) (Table 4).

**Phylogenetic Analysis of *boNT/B***

A phylogenetic tree was constructed from the full length of nucleotide sequences of 31 *C. botulinum* type B strains (Fig. 3), including B1, B2, B3, nonproteolytic B4, bivalent B5, and B7 subtypes, along with Osaka 05, and Osaka 06 together with the type B isolates from the Thailand 2010 outbreaks (Table 1). The reliability of the tree topology was estimated by the bootstrap method using 1000 replicates. In this analysis, Saraburi 2010 was closest to Iwate 2007 isolate, clustering with the bivalent B5 strains. The Saraburi 2010 *boNT/B* showed a 99.3% similarity to Iwate 2007 at the nucleotide sequences level.

Strain Maehongson 2010 was slightly different from other B2 type strains as it did not cluster with them (Fig. 3). However, this isolate displayed a 98.5% similarity to the 111, a B2 strain. The greater than or equal to 4.0% difference in amino acid sequence and lack of clustering with known BoNT B subtypes has characterized the Maehongson strain as a unique BoNT B subtype (B8).

**Further Characterization of Maehongson 2010 Isolates by Comparison of Nontoxic Genes**

Molecular characterization of the clusters of genes encoding the botulinum neurotoxin complex included the nontoxic components encoding the hemagglutinin genes (*ha70*, *ha33*, and *ha17*), the regulator gene (*botR*), and the nontoxic-non hemagglutinin gene (*ntnH*). The amino acid identities of the nontoxic components among Maehongson 2010, 111 (B2) and Okra (B1) are summarized in Table 3. The hemagglutinin cluster (*ha70*, *ha17* and *ha33*) of strain Maehongson 2010 showed identities and similarities of 98.1%/99.2%; 97.3%/97.1%; 84.6%/90.5%, respectively with strain 111 (B2) at the amino acid level (Table 3). When compared to the Okra isolate, strain Maehongson 2010 showed amino acid identities and similarities of 97.1%/98.6%; 99.3%/99.3%; 98.6%/100%, respectively (Table 3). More in depth analysis showed that *ha33* of Maehongson 2010 (B) had 47 amino acid substitutions compared to strain 111 (B2), but only four amino acid substitutions compared to strain Okra (B1). The gene *ha17* of strain Maehongson 2010 had four amino acid substitutions compared to strain 111 and one amino acid substitution compared to strain Okra.

The amino acid sequence identities and similarities of *botR* and *ntnH* between Maehongson 2010 and the B2 111 and B1 Okra isolates are shown in Table 3.

**PFGE Probe Hybridization**

The PFGE and Southern blot hybridization against undigested DNA using *boNT/A* and *boNT/B* toxin-specific gene probes confirmed that the Saraburi 2010 *boNT/A* and *boNT/B* genes were located on chromosomal DNA as hybridization signal was detected at position 970 Kb (Fig. 4). In Maehongson 2010, *boNT/B* gene was located on a plasmid (275 Kbp, Fig. 4D) at the same position as in strain 111 (Fig. 4).

**Discussion**

In this study, we examined the *C. botulinum* isolates from three different foodborne outbreaks in Thailand during 2010. The first outbreak occurred at Lampang province in April 2010, and was caused by *C. botulinum* type F which was typed by ELISA and mouse bioassay. The second and third outbreaks occurred in Saraburi and Maehongson provinces during May and December 2010, respectively. The *C. botulinum* isolates from Saraburi were identified as type A by mouse bioassay and ELISA, and the PCR patterns were consistent with type A1(B). The Maehongson isolates were determined as type B using the PCR assays for toxin and nontoxic gene cluster components.

The typing method of Umeda et al. [25,33] has several limitations in differentiating the *boNT/A1*, A2 and *boNT/B1* from B2 or B6 types. The typing for *boNT/A3*–A5, B3–B5 or B7 has not

**Table 3. Percentage of identity and similarity of *boNT/B* gene and nontoxic component genes compared with strain Maehongson 2010 and Okra (subtype B1) and strain Maehongson 2010 and 111 (subtype B2).**

| Strains compared (type)         | % Amino acid identity/similarity |                   |                   |                   |                    | Toxin gene (amino acid length) |
|---------------------------------|----------------------------------|-------------------|-------------------|-------------------|--------------------|--------------------------------|
|                                 | <i>ha70</i> (626)                | <i>ha17</i> (146) | <i>ha33</i> (885) | <i>botR</i> (178) | <i>ntnH</i> (1197) |                                |
| Maehongson 2010 (B) - 111 (B2)  | 98.1/99.2                        | 97.3/97.1         | 84.6/90.5         | 96.6/98.4         | 98.4/99.2          | <i>boNT/B</i> (1291)           |
| Maehongson 2010 (B) - Okra (B1) | 97.1/98.6                        | 99.3/99.3         | 98.6/100          | 96.6/99.4         | 96.9/98.2          | 95.5/98.0                      |

doi:10.1371/journal.pone.0077792.t003

**Table 4.** Summary of *boNT/B* amino acid substitution between strain Maehongson 2010(MH 2010) and 111 in each domain (light chain and H<sub>N</sub>) or subdomain (H<sub>CN</sub> and H<sub>CC</sub> in H<sub>C</sub>). Hyphens indicate residues identical to those in strain 111.

| Light chain (1–441) |         |     | H <sub>N</sub> domain (442–861) |         |     | H <sub>CN</sub> domain (862–1028) |         |     | H <sub>CC</sub> domain (1029–1192) |         |     | H <sub>CC</sub> domain (1193–1291) |         |     |
|---------------------|---------|-----|---------------------------------|---------|-----|-----------------------------------|---------|-----|------------------------------------|---------|-----|------------------------------------|---------|-----|
| Position            | MH 2010 | 111 | position                        | MH 2010 | 111 | position                          | MH 2010 | 111 | position                           | MH 2010 | 111 | position                           | MH 2010 | 111 |
| 147                 | G       | E   | 476                             | N       | D   | 919                               | V       | F   | 1029                               | R       | K   | 1200                               | H       | Y   |
| 148                 | E       | V   | 485                             | D       | R   | 956                               | M       | I   | 1032                               | R       | G   | 1249                               | F       | I   |
| 152                 | E       | K   | 486                             | F       | S   | 976                               | I       | T   | 1072                               | E       | K   | 1251                               | F       | L   |
| 253                 | G       | E   | 489                             | N       | D   | 982                               | I       | T   | 1105                               | S       | N   | 1252                               | Q       | K   |
| 389                 | D       | N   | 496                             | D       | N   | 993                               | K       | E   | 1132                               | Q       | N   | 1253                               | E       | D   |
| 406                 | G       | E   | 609                             | N       | S   | 995                               | V       | I   | 1138                               | D       | N   | 1256                               | Y       | N   |
|                     |         |     | 648                             | S       | A   | 997                               | E       | D   | 1148                               | K       | R   | 1270                               | K       | R   |
|                     |         |     | 750                             | S       | N   | 1011                              | L       | S   | 1174                               | L       | S   | 1276                               | D       | N   |
|                     |         |     | 768                             | I       | V   | 1026                              | M       | I   | 1176                               | Q       | R   | 1291                               | T       | I   |
|                     |         |     | 773                             | D       | N   |                                   |         |     | 1188                               | Q       | –   |                                    |         |     |
|                     |         |     | 836                             | M       | I   |                                   |         |     | 1189                               | Q       | E   |                                    |         |     |
|                     |         |     | 837                             | T       | P   |                                   |         |     | 1190                               | K       | E   |                                    |         |     |
|                     |         |     | 851                             | K       | E   |                                   |         |     | 1192                               | Q       | K   |                                    |         |     |
|                     |         |     | 852                             | M       | I   |                                   |         |     |                                    |         |     |                                    |         |     |
|                     |         |     | 853                             | V       | F   |                                   |         |     |                                    |         |     |                                    |         |     |

doi:10.1371/journal.pone.0077792.t004

been published. Moreover, the primers for typing *boNT/B1* could amplify the sequence position from 3256 to 3840 of strains Eklund17B (B4), ATCC 17844 (B4), Iwate 2007(B5), 657Ba(B5), CDC 593(B5) and CDC 1436(B5) which were almost the same sequences similar to that of strain Okra (B1). Studies of Franciosa et al. [37] and Cordoba et al. [38] confirmed the presence of silent or unexpressed *boNT/B* gene in some *C. botulinum* type A strains using PCR-restriction fragment length polymorphism and DNA probes. In this present finding, we have also shown that the Saraburi 2010 isolates carried a silent toxin encoding genes (Fig. 2), which were designated as toxin cluster type 3 (the *ha33*+and *p47*+ genes). In addition, Franciosa et al. [38] found that two strains of *C. botulinum* type A (strains CDC-1882 from infant botulism and CDC-1903 from food borne botulism) were negative for *ha33* and positive for *p47* genes (like type A2 strains), and displayed a *boNT/A1* PCR-RFLP type. This result was remarkable since this gene combination has been reported only for the *boNT/A* gene cluster of *C. botulinum* type A(B) and Ab strains. Franciosa et al. [38] hypothesized that a third *boNT/A* gene cluster may exist among strains of *C. botulinum* type A which were confirmed as toxin cluster type 3. Sequencing of the *boNT/A* and *boNT/B* genes from Saraburi 2010 revealed the complete identity at the amino acid level and similarity of the *boNT/A1* gene to the Iwate 2007 and NTCT 2916 strains (results not shown), while 99.6% identity and similarity of the *boNT/B* at the amino acid level were observed with Saraburi 2010 and Iwate 2007 strains. Thus, the silent B gene in Saraburi 2010 strain was more closely related to BoNT B5 (bivalent) which was shown in the phylogenetic tree (Fig. 3). *C. botulinum* strains that contain the genes of two toxin types probably evolve when one toxin type strain acquires the genes encoding different antigenic types. This transfer possibly involved not only the neurotoxin gene, but genes of the entire cluster that could differ in their arrangement and content. The mechanism of transfer is not known but would require a vector such as bacteriophages or conjugative transposable elements that are capable of transferring large regions of donor DNA [39]. Hutson

et al. [40] found that the most striking difference in isolates with silent neurotoxin gene sequences was the presence of a stop codon and sequence deletions in the gene of the A(B). These types of changes could affect transcription initiation or termination, or might produce a truncated protein with decreased toxicity. Alternatively, the quantities of toxin molecule synthesized might be similar, but their specific toxicities were different due to the changes in protein structure or post-translational modification. *C. botulinum* strains, the influences of amino acid substitutions/deletions on biological activity of the toxin molecule are not known.

The chromosomal or plasmid location of each *boNT* gene was examined to determine the similarity if any [41]. The location of the *boNT* gene and its associated nontoxic component genes varied among serotypes and strains. The *boNT/A1*, *boNT/A1(B)*, *boNT/A2* and *boNT/F* gene types are located in the bacterial chromosome, while the *boNT/A3*, *boNT/A4*, *boNT/bvB*, *boNT/B1*, *boNT/Bf* genes are located on plasmids [42–45]. The *boNT/npB* and *boNT/G* genes were identified in plasmids [46,47], while the *boNT/C* and *boNT/D* genes were carried on bacteriophage [48,49]. The Southern blot analysis from the undigested PFGE showed that both the *boNT/A* and *boNT/B* genes of Saraburi 2010 isolate were chromosomally located (Fig. 4B and 4D).

There are currently seven known subtypes within the *boNT/B* serotype, B1–B7, and they exhibit 1.5–7% sequence variations at the amino acid level. The amino acid variation within a subtype is much less (1.5%) in B2 and around 1.7% with other subtypes. The amino acid identity and similarity between the *boNT/B* of strain Maehongson 2010 and strain 111 were 96% and 98.5%, respectively. These amino acid differences indicate that Maehongson 2010 is a new BoNT B subtype or toxin variant [24,50]. The amino acid substitutions in strain Maehongson 2010 were assembled in the heavy chain (Table 4). This is supported by the phylogenetic analysis that places the strain Maehongson 2010 in a different cluster to other B2 subtypes (Fig. 3). The origin and mechanism of acquisition of the neurotoxin gene cluster are

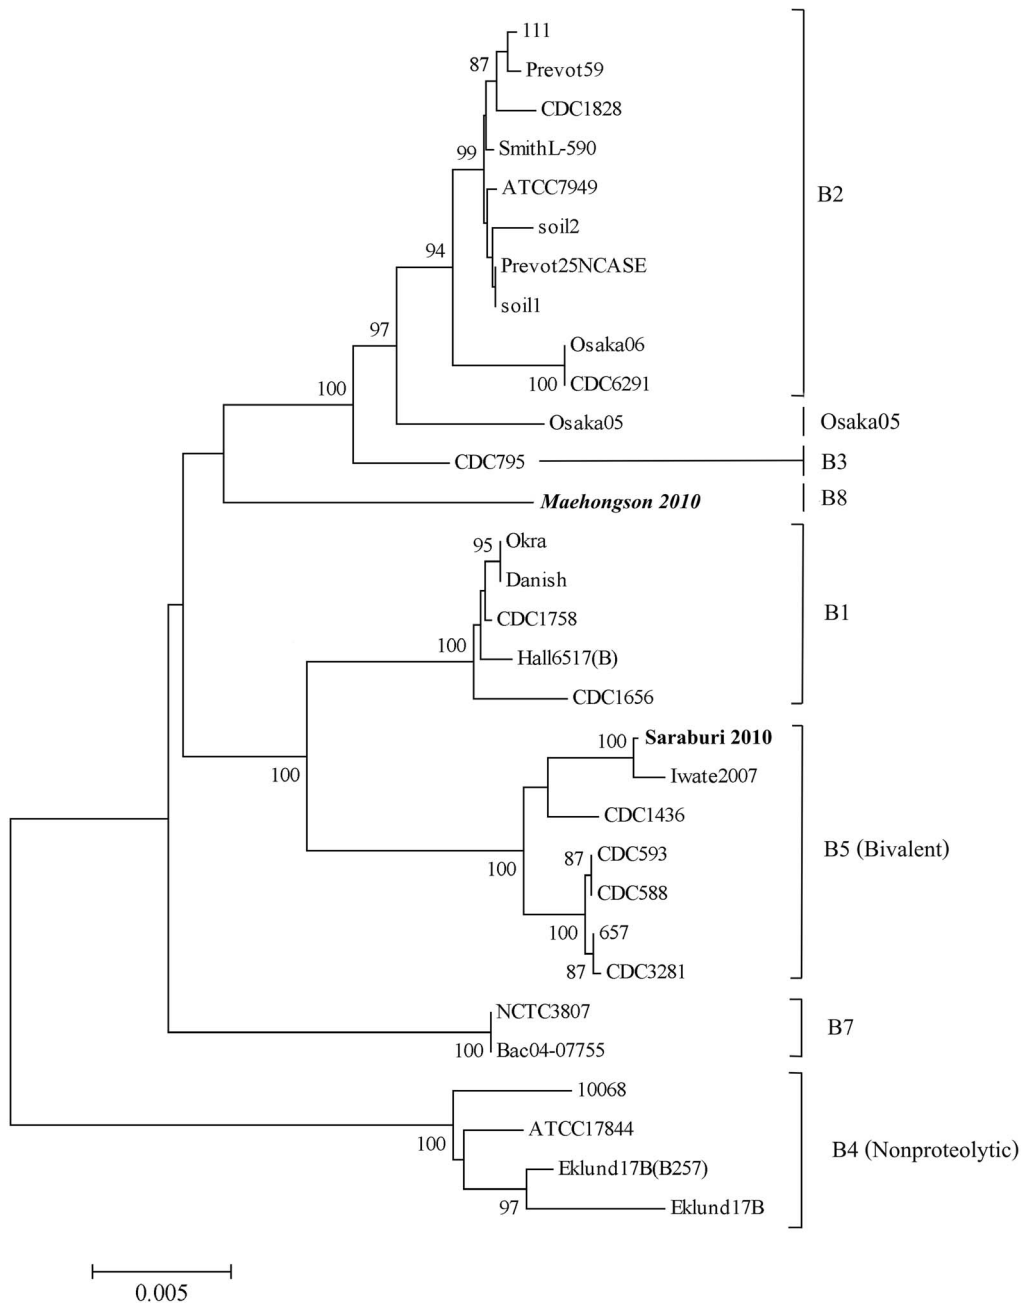

**Figure 3. Phylogenetic analysis of *boNT/B* nucleotide sequences from various *C. botulinum* strains.** The phylogenetic tree was generated using the neighbor-joining method in MEGA (v5) software. Bootstrap values (the percentage that each branch would occur after 1,000 bootstrap replicates) and genetic distance (bar) are shown. Clusters corresponding to different phylogenetic groups are labeled according to previous reports (Table 1). The toxin serotypes of the strains are shown on the right, and the Thai isolates from the 2010 outbreaks are highlighted. doi:10.1371/journal.pone.0077792.g003

intriguing. The gene arrangement and sequence homologies raise interesting questions. It appears likely that acquisition of the neurotoxin cluster occurred as a series of evolutionary events more recently than the divergence of the neurotoxic clostridia from a common precursor organism, as the neurotoxin gene clusters show relatively high homology. However, the origin for these genes are unknown [41,51]. On the other hand, the sequence differences between *boNT/B1* and *boNT/B2* genes indicate differences in molecular size, antigenicity and possibly receptor recognition at the neuromuscular junction [41]. The potency of

*BoNT* depends on its enzymatic activity and high affinity binding to neurons.

*BoNTs* are synthesized as single chain peptides with molecular mass of ~150 KDa that are proteolytically activated into a light chain (L; 50 KDa) and a heavy chain (H; 100 KDa) and linked by a disulfide bond. Functional activities are attributed to certain domains of *BoNT*. The H chain serves to transfer and deliver the L-chain into the cytosol of neuronal cells [52], the amino-terminal ( $H_N$ ) is associated with translocation of the L chain from the lumen of an acidic intracellular compartment into the cytosol subsequent to cell binding and receptor-mediated endocytosis. The carboxyl-



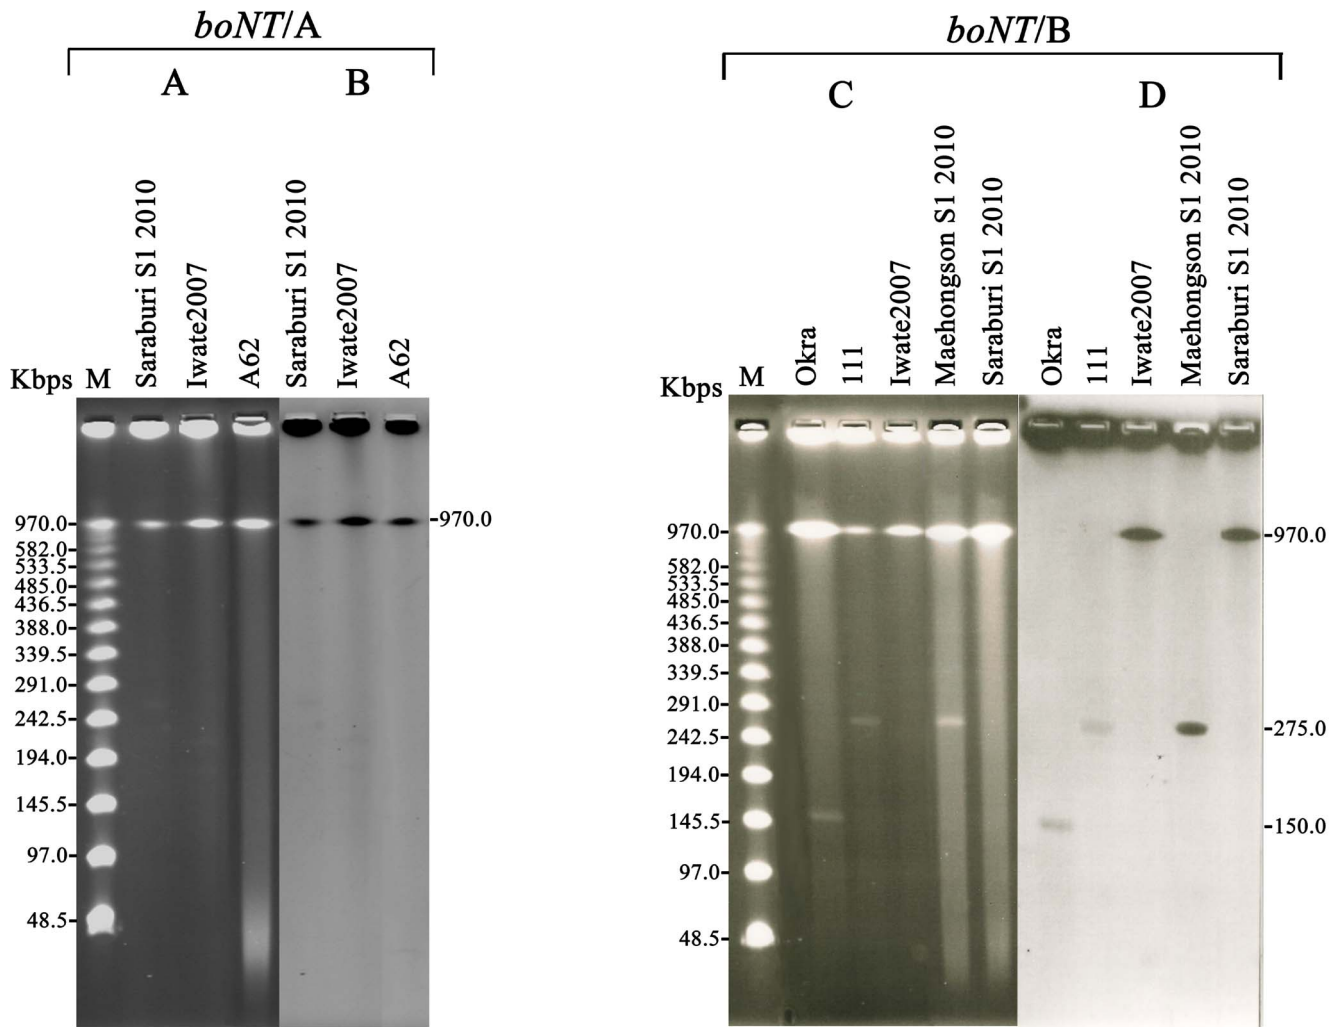

**Figure 4. PFGE and Southern blot hybridization of undigested bacterial DNA from the different *C. botulinum* strains and outbreak isolates to identify *boNT* gene location.** (A and C) undigested PFGE of isolated DNA (B) hybridization using a *boNT/A* probe (D) hybridization results with the *boNT/B* probe.

doi:10.1371/journal.pone.0077792.g004

terminal domain of the H-chain ( $H_c$ ) displays highly selective binding for neurons, particularly those of the cholinergic system [53]. Therefore, the high amino acid variability presented in the  $H_{cc}$  terminal (22/263 residues) of strain Maehongson 2010 could affect neuronal binding and antibody specificity of the neurotoxin. This information may be important for the identification of more specific and efficient immunoglobulin than currently used equine immunoglobulin. Various monoclonal antibodies have been proposed as immunoglobulin treatments for botulism [54–56]. If there is any differential binding of these antibodies to the different subtypes, selection of antibodies for treatment should be accurate, as they may not be effective for neutralizing all subtypes of BoNT within a serotype [57].

BoNTs are associated with non-toxic proteins (ANTPs) that form complexes of various sizes that facilitate the translocation of the toxin [58]. Genomic analyses have provided evidence of horizontal gene transfer, site-specific insertion, and recombination events, which contribute to the variations among the neurotoxins, the toxin gene clusters and the bacteria in which

they occurred [39]. The *boNT* genes lie in the 3' portion of the locus and are immediately preceded by the non-toxic and non-hemagglutinin gene components (NTNH). The *ntnh* and *boNT* genes are transcribed in the same orientation, and the genes encoding hemagglutinin components (HA33, HA17 and HA70 in *C. botulinum* A) are upstream of these and are transcribed in the opposite direction. Our results showed high amino acid level identity and similarity of the *ha33* and *ha17* genes (98.64% and 99.32% identities, respectively) between B (Maehongson 2010) and B1 (Okra), but the *ha70*, *botR* and *ntnh* genes of B (Maehongson 2010) showed greater similarity at the amino acid level to B2 (111) (Table 3), reinforcing the idea that strain Maehongson 2010 could be different from others type B2. The variation in the composition of the hemagglutinins in the BoNT complexes might affect both the functionality and potency of neurotoxin itself [59], and there is an indication that the hemagglutinins may also facilitate the absorption of BoNT from intestines into the bloodstream [58].

The *boNT* genes are located within plasmids of varying sizes (47.6–270 Kb) [46,60] or within the bacterial chromosome. The probe for the BoNT B genes for strains 111 and Maehongson 2010 hybridized to a band of ~275 Kbp in the PFGE probe experiment (Fig. 4D). This size is similar to that of plasmids containing *boNT/A3*, *Ba*, and *Bf* genes (~245–270 Kbp) [39,46]. No chromosomal band was hybridized to the *boNT/B* probe, indicating that the plasmids are not integrated into the chromosome. The plasmid may play an important role in mediating genetic transfer within and among the bacterial genomes [61], and this has important implications in the evolution and pathogenicity of *C. botulinum*, including acquisition and expression of the toxin [62]. A future challenge has to consider whether the *boNT*-encoding plasmids play a role in the development and/or flexibility of *C. botulinum*, potentially increasing its adaptability to certain niches, such as food matrixes and specific environments, and ultimately contributing to the disease of botulism. Molecular genotyping of *C. botulinum* is an important tool contributing to our general understanding

of the organism and the pathological consequences of infection. It is likely that differences in toxins will require a full understanding of specific antibody therapeutics.

## Acknowledgments

We thank Dr. Thareerat Kalambaheti, Faculty of Tropical Medicine, Mahidol University for help with the Southern blot technique and Dr. Jotika Boon-Long, National Institute of Health, Department of Sciences, Thailand for her suggestions. We would especially like to thank Dr. Toni Whistler, International Emerging Infections Program, Thailand Ministry of Public Health - US CDC Collaboration and Dr. T. Ramamurthy, National Institute of Cholera and Enteric diseases, Kolkata, India for their help in revising this manuscript.

## Author Contributions

Conceived and designed the experiments: PW PS SK KI. Performed the experiments: PW T. Kohda CJ KS T. Kamthalang KU. Analyzed the data: PW. Contributed reagents/materials/analysis tools: PS KU SK. Wrote the paper: PW KI.

## References

- Swaddiwudhipong W, Wongwatharapaiboon P (2000) Foodborne botulism outbreaks following consumption of home-canned bamboo shoots in Northern Thailand. *J Med Assoc Thai* 83: 1021–1025.
- Centers for Disease Control and Prevention (1999) Foodborne botulism associated with home-canned bamboo shoots, Thailand, 1998. *MMWR* 48: 437–439.
- Kongsangdao S, Samintarapanya K, Rasmeechan S, Wongs A, Pothirat C, et al. (2006) An outbreak of botulism in Thailand: Clinical manifestations and management of severe respiratory failure. *Clin Infect Dis* 43: 1247–1256.
- Centers for Disease Control and Prevention (2006) Botulism from Home-Canned Bamboo Shoots – Nan Province, Thailand, March 2006. *MMWR* 55: 389–392.
- Hatheway CL (1995) Botulism: the present status of the disease. *Curr Top Microbiol Immunol* 195: 55–75.
- Hatheway CL (1988) Botulism. In: Balows A, Hausler WH, Ohashi M, Turnano A, editors. *Laboratory diagnosis of infectious diseases principles and practice*. New York: Springer. pp. 111–133.
- Szilagy M, Rivera VR, Neal D, Merrill GA, Poli MA (2000) Development of sensitive colorimetric capture elisas for *Clostridium botulinum* neurotoxin serotypes A and B. *Toxicol* 38: 381–389.
- Sharma SK, Ferreira JL, Eblen BS, Whiting RC (2006) Detection of type A, B, E, and F *Clostridium botulinum* neurotoxins in foods by using an amplified enzyme-linked immunosorbent assay with digoxigenin-labeled antibodies. *Appl Environ Microbiol* 72: 1231–1238.
- Maslanka S, Luquez C, Raphael B, Dykes J, Joseph L (2011) Utility of Botulinum Toxin ELISA A, B, E, F kits for clinical laboratory investigations of human botulism. *TBJ* 2: 72–92.
- Bagramyan K, Barash JR, Arnon SS, Kalkum M (2008) Attomolar detection of botulinum toxin type A in complex biological matrices. *PLoS ONE* 3: e2041.
- Dowell VR Jr, Hawkins TM (1987) Laboratory methods in anaerobic bacteriology CDC Laboratory Manual. Atlanta: DHEW Publication. 8272 p.
- Holdeman LV, Cato EP, Moore WEC (1977) *Anaerobe Laboratory Manual* 4<sup>th</sup>. Blacksburg: Virginia Polytechnic Institute and State University. 156 p.
- Hatheway CL, Dang C (1994) Immunogenicity of neurotoxins of *Clostridium botulinum*. In: Jankovic J, Hallett M, editors. *Therapy with botulinum toxin*. New York: Marcel Dekker. pp. 93–107.
- Brett MM (1998) Evaluation of the use of the bioMerieux Rapid ID32A for the identification of *Clostridium botulinum*. *Lett Appl Microbiol* 26: 81–84.
- Lindström MK, Jankola HM, Hielm S, Hyytiä EK, Korkeala HJ (1999) Identification of *Clostridium botulinum* with API 20 A, Rapid ID 32 A and RapID ANA II. *FEMS Immunol Med Microbiol* 24: 267–274.
- Lindström MK, Keto R, Markkula A, Nevas M, Hielm S, et al. (2001) Multiplex PCR assay for detection and identification of *Clostridium botulinum* types A, B, E, and F in food and fecal material. *Appl Environ Microbiol* 67: 5694–5699.
- De Medici D, Anniballi F, Wyatt GM, Lindström M, Messelhäuser U, et al. (2009) Multiplex PCR for detection of botulinum neurotoxin-producing clostridia in clinical, food, and environmental samples. *Appl Environ Microbiol* 75: 6457–6461.
- Aranda E, Rodriguez MM, Asensio MA, Cordoba JJ (1997) Detection of *Clostridium botulinum* types A, B, E and F in foods by PCR and DNA probe. *Lett Appl Microbiol* 25: 186–190.
- Popoff MR (1995) Ecology of neurotoxic strains of clostridia. *Curr Top Microbiol Immunol* 195: 1–29.
- Sonnabend O, Sonnabend W, Heinze R, Sigrist T, Dirnhofer R, et al. (1981) Isolation of *Clostridium botulinum* type G and identification of type G botulinum toxin in humans: report of five sudden unexpected deaths. *J Infect Dis* 143: 22–27.
- Sonnabend WF, Sonnabend UP, Kreck T (1987) Isolation of *Clostridium botulinum* type G from Swiss soil specimens by using sequential steps in an identification scheme. *Appl Environ Microbiol* 53: 1880–1884.
- Macdonald TE, Helma CH, Shou Y, Valdez YE, Ticknor LO, et al. (2011) Analysis of *Clostridium botulinum* serotype E strains by using multilocus sequence typing, amplified fragment length polymorphism, variable-number tandem-repeat analysis, and botulinum neurotoxin gene sequencing. *Appl Environ Microbiol* 77: 8625–8634.
- Jacobson MJ, Lin G, Tepp W, Dupuy J, Stenmark P, et al. (2011) Purification, modeling, and analysis of botulinum neurotoxin subtype A5 (BoNT/A5) from *Clostridium botulinum* strain A661222. *Appl Environ Microbiol* 77: 4217–4222.
- Kalb SR, Baudys J, Rees JC, Smith TJ, Smith LA, et al. (2012) De novo subtype and strain identification of botulinum neurotoxin type B through toxin proteomics. *Anal Bioanal Chem* 403: 215–226.
- Umeda K, Seto Y, Kohda T, Mukamoto M, Kozaki S (2009) Genetic characterization of *Clostridium botulinum* associated with type B infant botulism in Japan. *J Clin Microbiol* 47: 2720–2728.
- Raphael BH, Lautenschlager M, Kalb SR, de Jong LI, Frace M, et al. (2012) Analysis of a unique *Clostridium botulinum* strain from the Southern hemisphere producing a novel type E botulinum neurotoxin subtype. *BMC Microbiol* 12: 245.
- Raphael BH, Choudoir MJ, Lúquez C, Fernández R, Maslanka SE (2010) Sequence diversity of genes encoding botulinum neurotoxin type F. *Appl Environ Microbiol* 76: 4805–4812.
- Raffestin S, Couesnon A, Pereira Y, Mazuet C, Popoff MR (2009) Botulinum and tetanus neurotoxins: molecular biology, toxin gene regulation and mode of action. In: Bruggemann H, Gottschalk G, editors. *Clostridia: molecular biology in the post-genomic era*. Norfolk: Caister Academic Press. pp. 1–28.
- Moriishi K, Koura M, Abe N, Fujii N, Fujinaga Y, et al. (1996) Mosaic structures of neurotoxins produced from *Clostridium botulinum* types C and D organisms. *Biochem Biophys Acta* 1307: 123–126.
- Nakamura K, Kohda T, Shibata Y, Tsukamoto K, Arimitsu H, et al. (2012) Unique biological activity of botulinum D/C mosaic neurotoxin in murine species. *Infect Immun* 80: 2886–2893.
- Woudstra C, Skarin H, Anniballi F, Fencia L, Bano L, et al. (2012) Neurotoxin gene profiling of *Clostridium botulinum* types C and D native to different countries within Europe. *Appl Environ Microbiol* 78: 3120–3127.
- Roe DE, Finegold SM, Citron DM, Goldstein EJG, Wexler HM, et al. (2002) Multilaboratory comparison of growth characteristics for anaerobes, using 5 different agar media. *Clin Infect Dis* 35: S36–S39.
- Umeda K, Seto Y, Kohda T, Mukamoto M, Kozaki S (2010) A novel multiplex PCR method for *Clostridium botulinum* neurotoxin type A gene cluster typing. *Microbiol Immunol* 54: 308–312.
- Larkin MA, Blackshields G, Brown NP, Chenna R, McGettigan PA, et al. (2007) Clustal W and Clustal X version 2.0. *BMC* 23: 2947–2948.
- Tamura K, Peterson D, Peterson N, Stecher G, Nei M, et al. (2011) MEGA5: Molecular Evolutionary Genetics Analysis using Maximum Likelihood, Evolutionary Distance, and Maximum Parsimony Methods. *Mol Biol Evol* 28: 2731–2739.
- Takeshi K, Fujinaga Y, Inoue K, Nakajima H, Oguma K, et al. (1996) Simple method for detection of *Clostridium botulinum* type A to F neurotoxin genes by polymerase chain reaction. *Microbiol Immunol* 40: 5–11.

37. Franciosa G, Floridi F, Maugliani A, Aureli P (2004) Differentiation of the gene clusters encoding botulinum neurotoxin type A complexes in *Clostridium botulinum* type A, Ab, and A(B) strains. *Appl Environ Microbiol* 70: 7192–7199.
38. Cordoba JJ, Collins MD, East AK (1995) Studies on the Genes Encoding Botulinum Neurotoxin Type A of *Clostridium botulinum* from a Variety of Sources. *Syst Appl Microbiol* 18: 13–22.
39. Hill KK, Xie G, Foley BT, Smith TJ, Munk AC, et al. (2009) Recombination and insertion events involving the botulinum neurotoxin complex genes in *Clostridium botulinum* types A, B, E and F and *Clostridium butyricum* type E strains. *BMC Biol* 7: 66.
40. Hutson RA, Zhou Y, Collins MD, Johnson EA, Hatheway CL, et al. (1996) Genetic characterization of *Clostridium botulinum* type A containing silent type B neurotoxin gene sequences. *J Biol Chem* 271: 10786–10792.
41. Hill KK, Smith TJ, Helma CH, Ticknor LO, Foley BT, et al. (2007) Genetic diversity among Botulinum Neurotoxin-producing clostridial strains. *J Bacteriol* 189: 818–832.
42. Binz T, Kurazono H, Wille M, Frevert J, Wernars K, et al. (1990) The complete sequence of botulinum neurotoxin type A and comparison with other clostridial neurotoxins. *J Biol Chem* 265: 9153–9158.
43. Oguma K, Fujinaga Y, Inoue K (1995) Structure and function of *Clostridium botulinum* toxins. *Microl Immunol* 39: 161–168.
44. Whelan SM, Elmore MJ, Bodsworth NJ, Brehm JK, Atkinson T, et al. (1992) Molecular cloning of the *Clostridium botulinum* structural gene encoding the type B neurotoxin and determination of its entire nucleotide sequence. *Appl Environ Microbiol* 58: 2345–2354.
45. Zhou Y, Sugiyama H, Nakano H, Johnson EA (1995) The genes for the *Clostridium botulinum* type G toxin complex are on a plasmid. *Infect Immun* 63: 2087–2091.
46. Franciosa G, Maugliani A, Scalfaro C, Aureli P (2009) Evidence that plasmid-borne botulinum neurotoxin type B genes are widespread among *Clostridium botulinum* serotype B strains. *PLoS ONE* 4: e4829.
47. Eklund MW, Poysky FT, Mseitif LM, Strom MS (1988) Evidence for plasmid-mediated toxin and bacteriocin production in *Clostridium botulinum* type G. *Appl Environ Microbiol* 54: 1405–1408.
48. Inoue K, Iida H (1970) Conversion of toxigenicity in *Clostridium botulinum* type C. *Jpn J Microbiol* 14: 87–89.
49. Eklund MW, Poysky FT, Reed SM (1972) Bacteriophage and the toxigenicity of *Clostridium botulinum* type D. *Nat New Biol* 235: 16–17.
50. Carter AT, Paul CJ, Mason DR, Twine SM, Alston MJ, et al. (2009) Independent evolution of neurotoxin and flagellar genetic loci in proteolytic *Clostridium botulinum*. *BMC Genomics* 10: 115.
51. Johnson EA (1999) Clostridial toxins as therapeutic agents: benefits of nature's most toxic proteins. *Annu Rev Microbiol* 53: 551–575.
52. Tsukamoto K, Kohda T, Mukamoto M, Takeuchi K, Ihara H, et al. (2005) Binding of *Clostridium botulinum* type C and D neurotoxins to ganglioside and phospholipid. Novel insights into the receptor for clostridial neurotoxins. *J Biol Chem* 280: 35164–35171.
53. Simpson LL (2004) Identification of the major steps in botulinum toxin action. *Annu Rev Pharmacol Toxicol* 44: 167–193.
54. Mukherjee J, McCann C, Ofori K, Hill J, Baldwin K, et al. (2012) Sheep monoclonal antibodies prevent systemic effects of botulinum neurotoxin A1. *Toxins* 4: 1565–1581.
55. Chow SK, Casadevall A (2012) Monoclonal antibodies and toxins—a perspective on function and isotype. *Toxins* 4: 430–454.
56. Mowry MC, Meagher M, Smith L, Marks J, Subramanian A (2004) Production and purification of a chimeric monoclonal antibody against botulinum neurotoxin serotype A. *Protein Expr Purif* 37: 399–408.
57. Lou J, Geren I, Garcia-Rodriguez C, Forsyth CM, Wen W, et al. (2010) Affinity maturation of human botulinum neurotoxin antibodies by light chain shuffling via yeast mating. *Protein Eng Des Sel* 23: 311–319.
58. Matsumura T, Jin Y, Kabumoto Y, Takegahara Y, Oguma K, et al. (2008) The HA proteins of botulinum toxin disrupt intestinal epithelial intercellular junctions to increase toxin absorption. *Cell Microbiol* 10: 355–364.
59. Smith TJ, Lou J, Geren IN, Forsyth CM, Tsai R, et al. (2005) Sequence variation within botulinum neurotoxin serotypes impacts antibody binding and neutralization. *Infect Immun* 73: 5450–5457.
60. Smith TJ, Hill KK, Foley BT, Detter JC, Munk AC, et al. (2007) Analysis of the neurotoxin complex genes in *Clostridium botulinum* A1–A4 and B1 strains: BoNT/A3-/Ba4 and/B1 clusters are located within plasmids. *PLoS ONE* 2: e1271.
61. Kelly BG, Vespermann A, Bolton DJ (2009) The role of horizontal gene transfer in the evolution of selected foodborne bacterial pathogens. *Food Chem Toxicol* 47: 951–968.
62. Arndt JW, Jacobson MJ, Abola EE, Forsyth CM, Tepp WH, et al. (2006) A structural perspective of the sequence variability within botulinum neurotoxin subtypes A1–A4. *J Mol Biol* 362: 733–742.
